# Supplementary material for: Apoptotic cell administration is detrimental in murine renal ischaemia reperfusion injury
Source: Springer Nature journal article supplement (doi:10.1186/s12950-014-0031-6), 2014-10-09

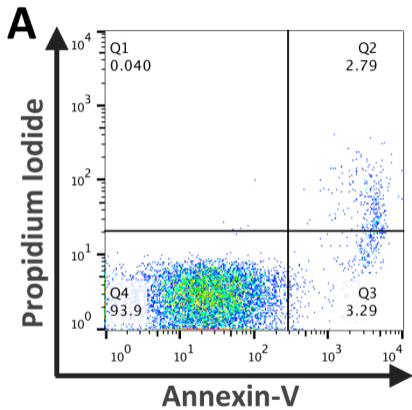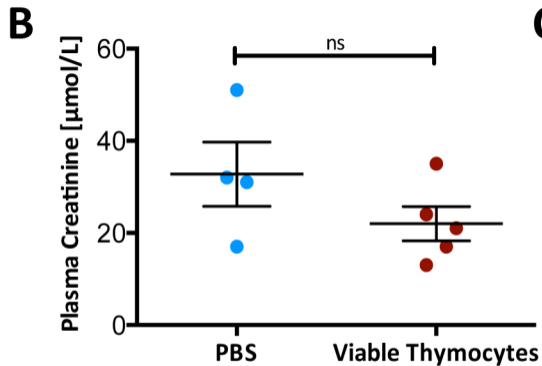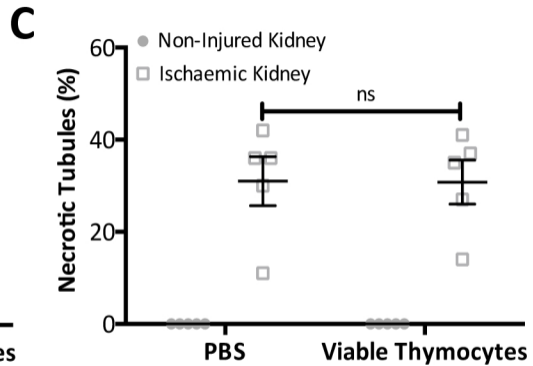

Supplement: MOESM2 [file 9763568]
